# Supplementary material for: Development of a Cross-Disciplinary Investigative Model for the Introduction of Microarray Techniques at Non-R1 Undergraduate Institutions
Source: Atypon-hosted journal article supplement (doi:10.1187/cbe.07-01-0006), 2008-03-01
Supplement: supplemental_data.pdf [file supplemental_data.pdf]

## Appendix "A"

### MasterPure™ Yeast RNA Purification Kit from Epicentre Modified Version

(Done by: David Walker, Gary Lutz and Consuelo Alvarez, May 2005)

Modifications are shown in bold font. The original protocol can be seeing at Epicentre web page: [www.EpiBio.com/](http://www.EpiBio.com/)

#### Part A. RNA Purification

1. Dilute 1 ul of 50 ug/ul Proteinase K into 300 ul of Extraction Reagent for RNA for each sample. A premix may be prepared for multiple samples.
2. Pellet cells by centrifugation and discard the supernatant. The optimal number of cells varies with the species, but **2 ml** of a mid-log culture gives good results for *Saccharomyces cerevisiae*.
3. Vortex mix 10 seconds to loosen the cell pellet.
4. Add 300 ul of Extraction Reagent for RNA containing the Proteinase K and mix thoroughly by vortexing.
5. Incubate at 70°C for **30 minutes**; vortex mix every 5minutes.
6. Place the samples on ice for 3-5 minutes and add 175 ul of MPC Protein Precipitation Reagent to 300 ul lysed samples (solution may become cloudy). Vortex vigorously for 10 seconds.
7. Pellet the debris by centrifugation for 10 minutes at 4°C at  $\geq 10,000 \times g$  in a microcentrifuge.
8. Transfer the supernatant fluid to a clean microcentrifuge tube and discard the pellet.
9. Add 500ul of isopropanol to the recovered supernatant fluid. Invert the tube 30-40 times.
10. Pellet the RNA by centrifugation at 4°C for 10 minutes at  $\geq 10,000 \times g$  in a microcentrifuge.
11. Carefully pour off or aspirate the isopropanol without dislodging the RNA pellet.  
**Since removal of contaminating DNA is required, proceed with the DNase I treatment in part B.**

#### Part B. Removal of Contaminating DNA from RNA Preparations

1. Remove all of the residual isopropanol with a pipet.
2. Prepare 200ul of DNase I solution for each sample. Add 20 ul of 10X DNase Buffer to 175 ul deionized water, then add 5 ul of RNase-Free DNase I.
3. Completely resuspend the nucleic acid pellet in 200 ul of DNase I solution.
4. Incubate at 37°C for **30 minutes**.
5. Add 200ul of 2X T and C Lysis Solution; vortex for 5 seconds.
6. Add 200 ul of MPC Protein Precipitation Reagent (solution maybe be cloudy). Vortex for 10 seconds; place on ice 3-5 minutes.
7. Pellet the debris by centrifugation at 4°C for 10 minutes at  $\geq 10,000 \times g$  in a microcentrifuge.
8. Transfer the supernatant containing the RNA into a clean microcentrifuge tube and discard the pellet.
9. **To obtain a completely clear supernatant, repeat step 7 and 8 at least one more time.**
10. Add 500 ul of isopropanol to the supernatant. Invert the tube 30-40 times.

11. Pellet the purified RNA by centrifugation at 4°C for 10 minutes in a microcentrifuge at  $\geq 10,000 \times g$ .
12. Carefully pour off or aspirate the isopropanol without dislodging the RNA pellet.
13. Rinse twice with 70% ethanol, being careful to not dislodge the pellet. Centrifuge briefly if the pellet is dislodged. Remove all the residual ethanol with a pipet.
- 14. Air-dry the pellet for a few minutes (3-5).**
- 15. Allow the cleaned RNA preparation to precipitate in ethanol at  $-20^{\circ}\text{C}$  (Alvarez and Wise, 2001). The quality and concentration of the RNA sample should be determined before continuing with the cDNA preparation.**

# Effects of Ultraviolet Radiation on *Saccharomyces cerevisiae* Using Microarray Analysis

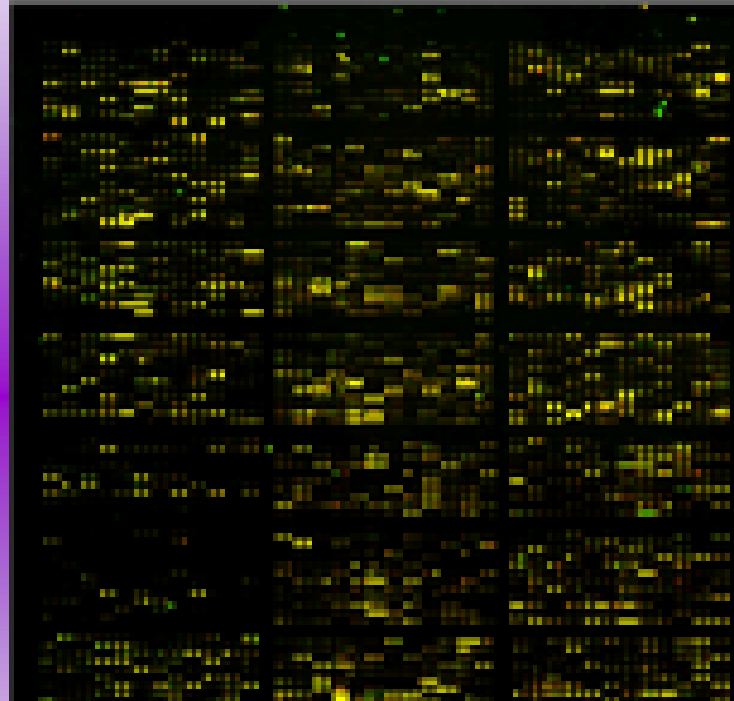

By: David Walker

Department of Natural Sciences

Longwood University

201 High Street

Farmville, Virginia 23909

# Research Components

- Genetics: yeast, a model system of humans
- Stress Imposed: UV radiation
- Microarray: why?
- Goals
  - Examine the changes in gene expression to an environmental stress
  - Introduction to research and a novel technique

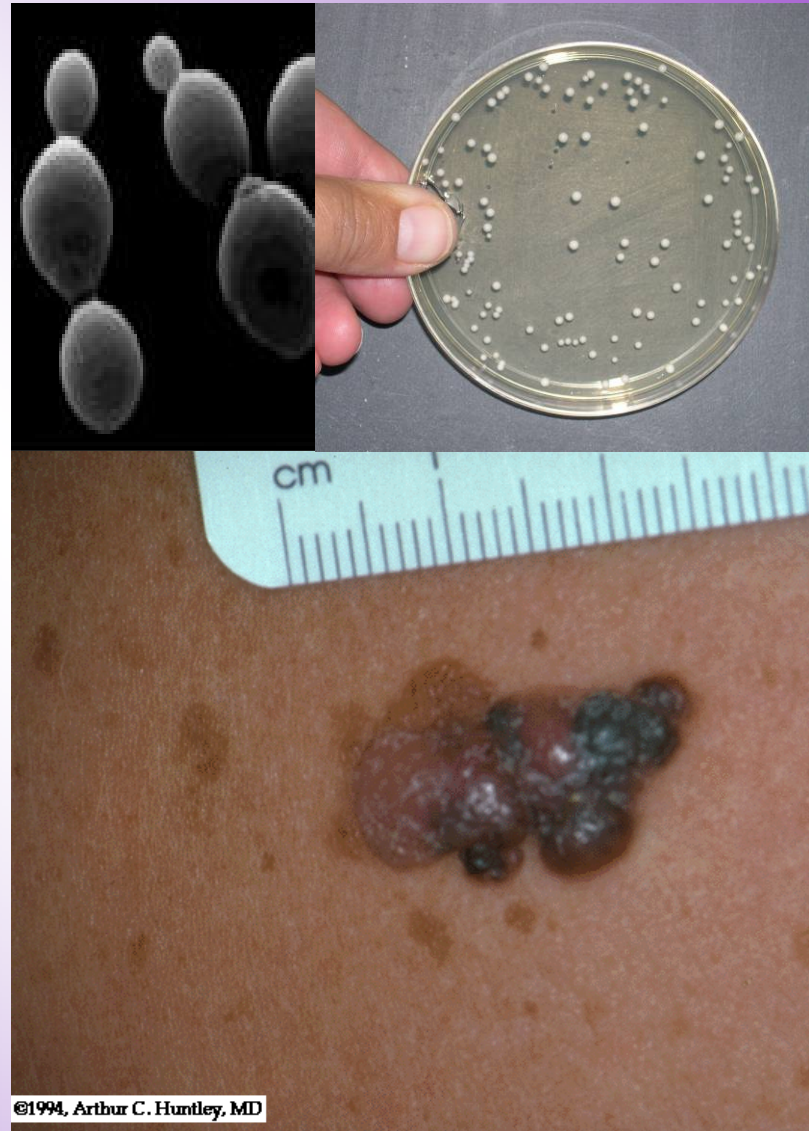

©1994, Arthur C. Huntley, MD

# Procedure

- Cell growth
  - YPD media
  - Log phase
- Exposure of cells to UV light
  - UV-B region
- RNA prep
  - Isolation of mRNA
    - GTE Phenol-chloroform
    - Qiagen RNeasy
    - Total RNA Safekit
    - Epicenter MasterPure kit

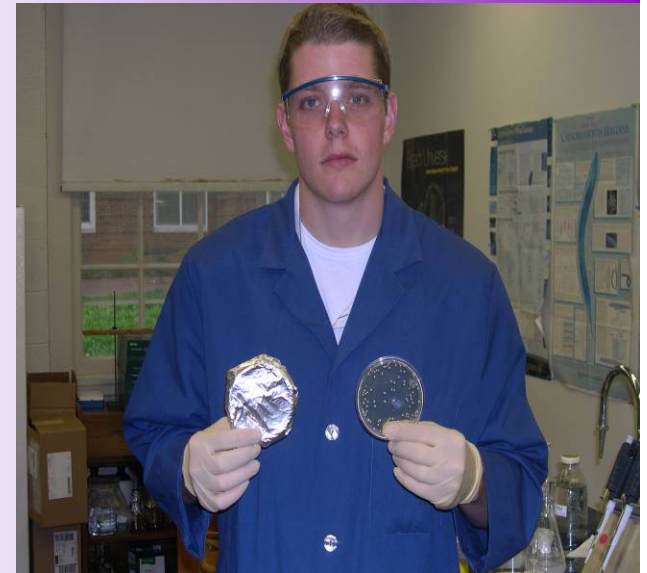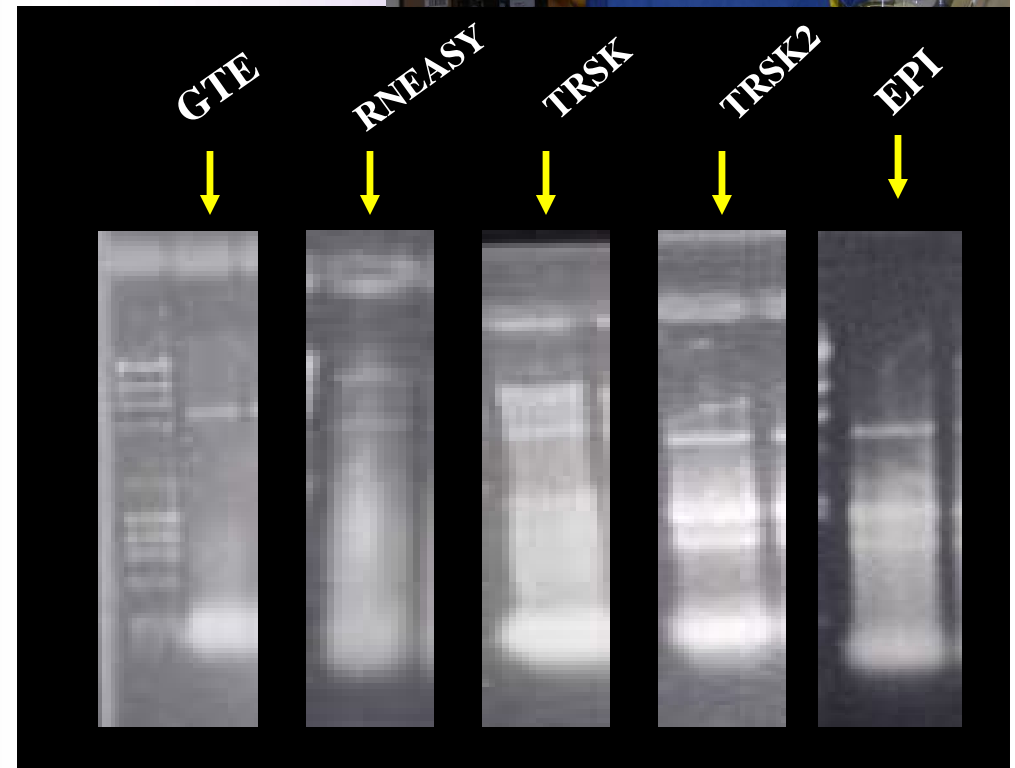

# Procedure Continued

## Microarray Protocol

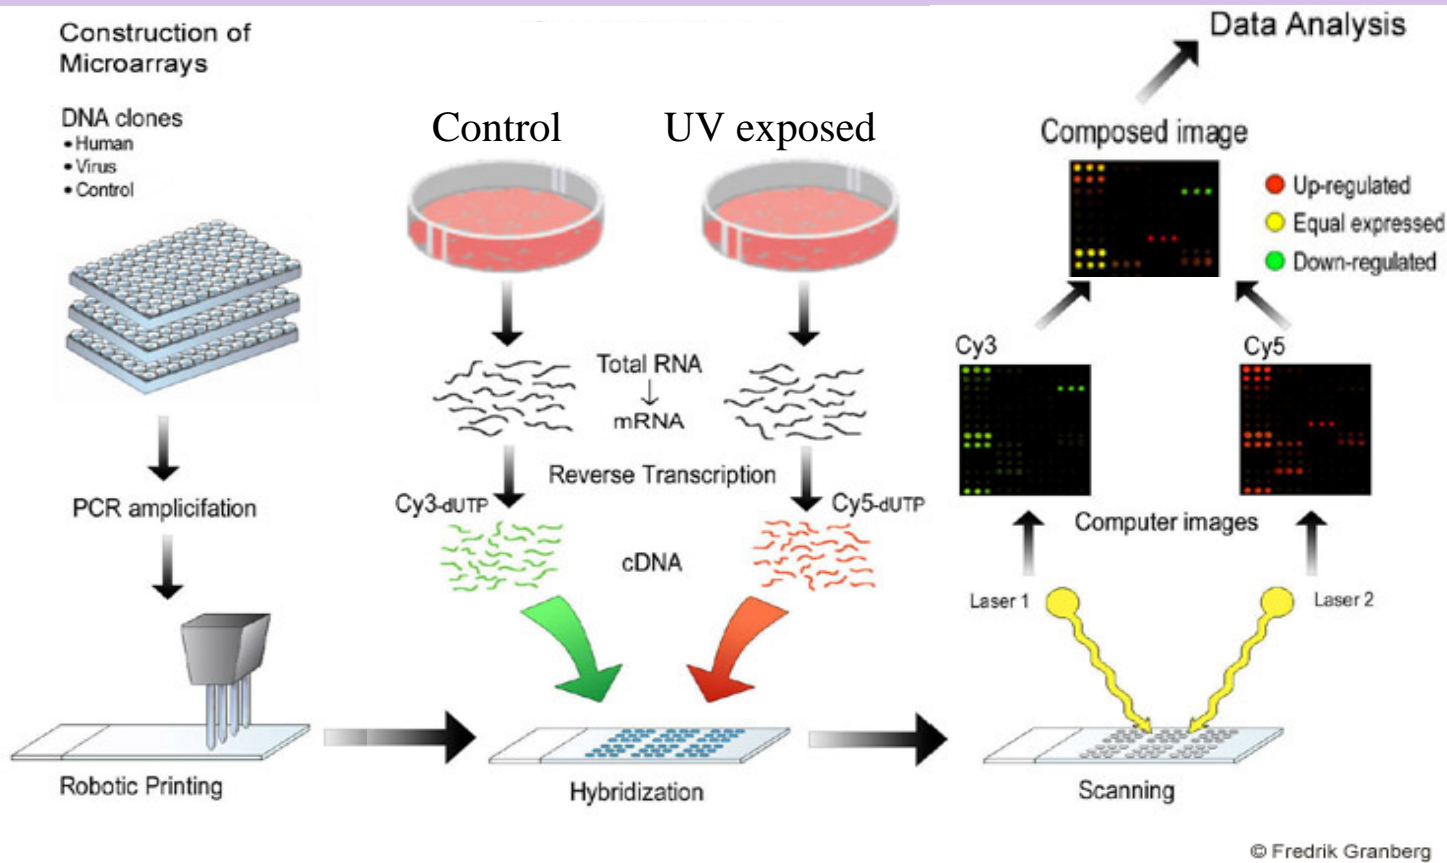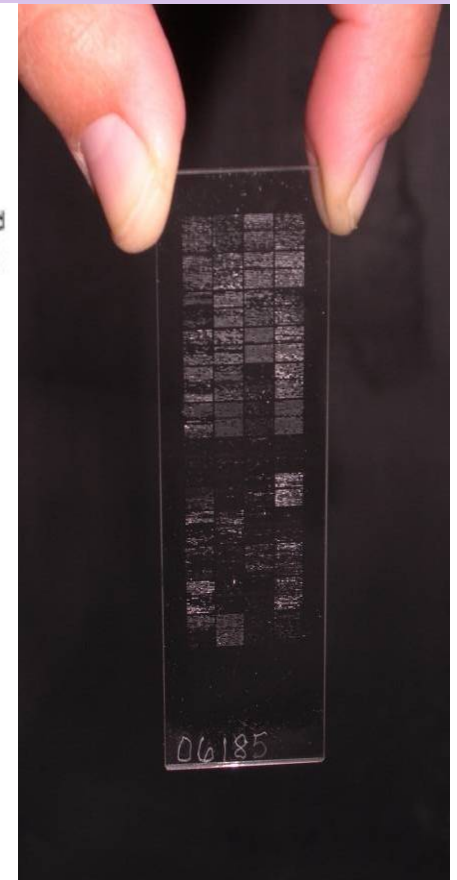

# Microarray Protocol

- Protocols Used:
  - Genisphere 3DNA Array 350
    - Use of dyes after cDNA hybridization
    - 10ug mRNA
  - ISB Protocol
    - Use of dyes during reverse transcription
    - 50ug of mRNA

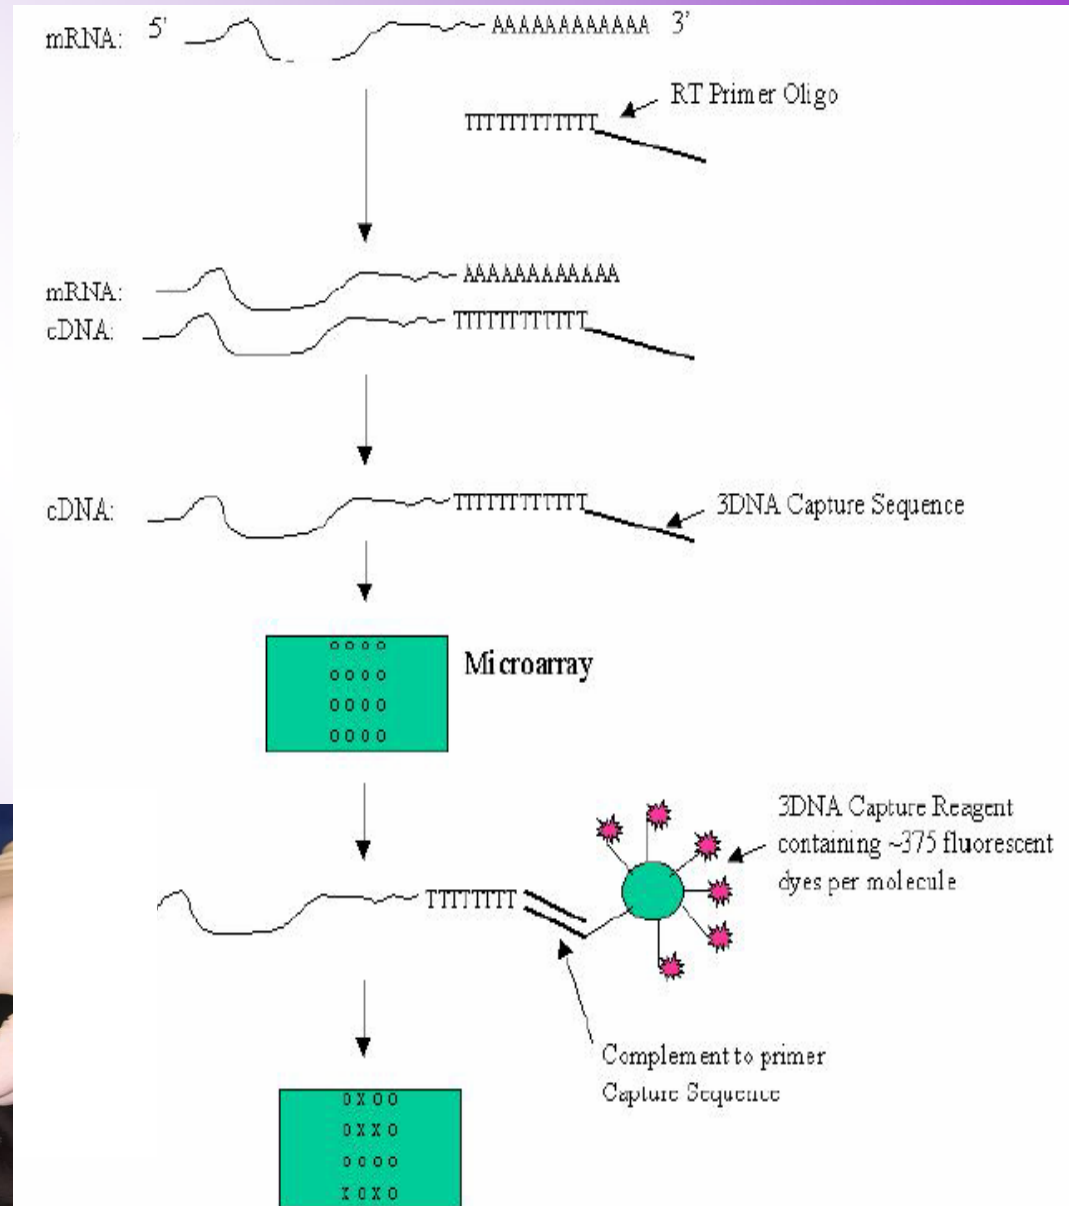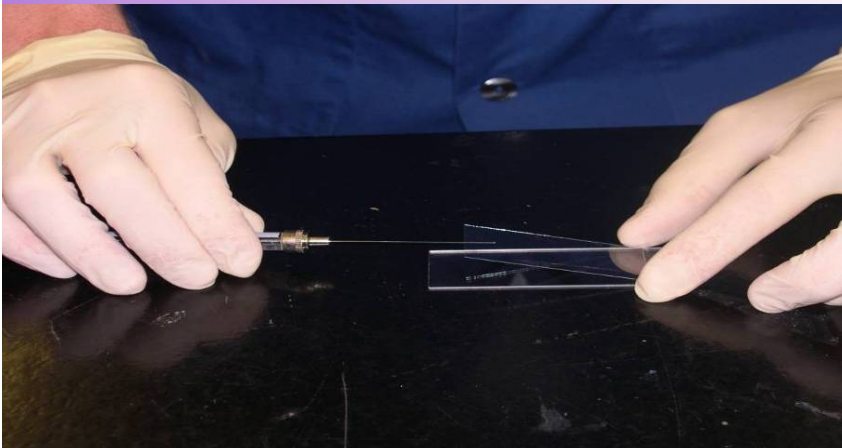

# Results

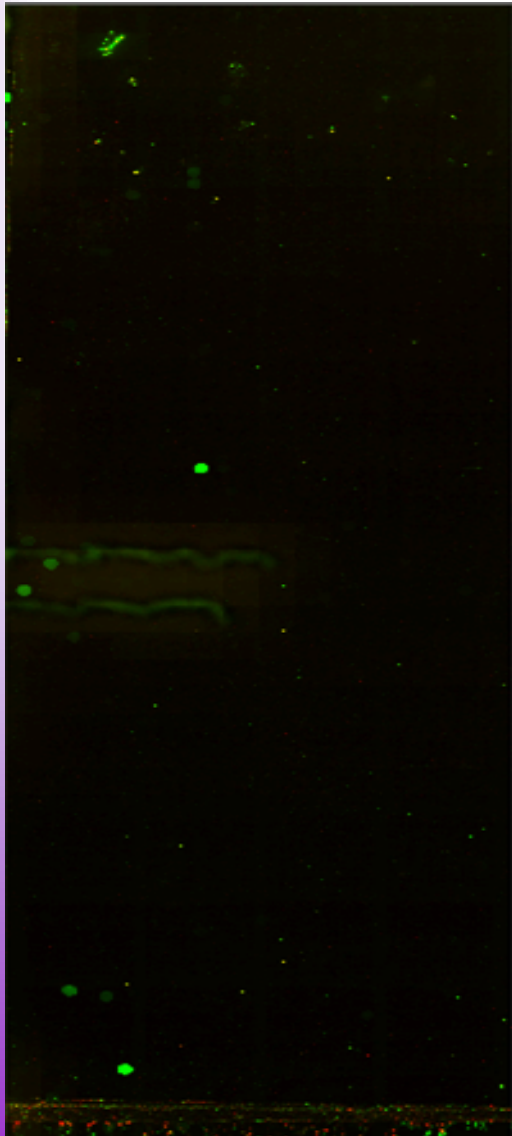

Genisphere 2/4/05

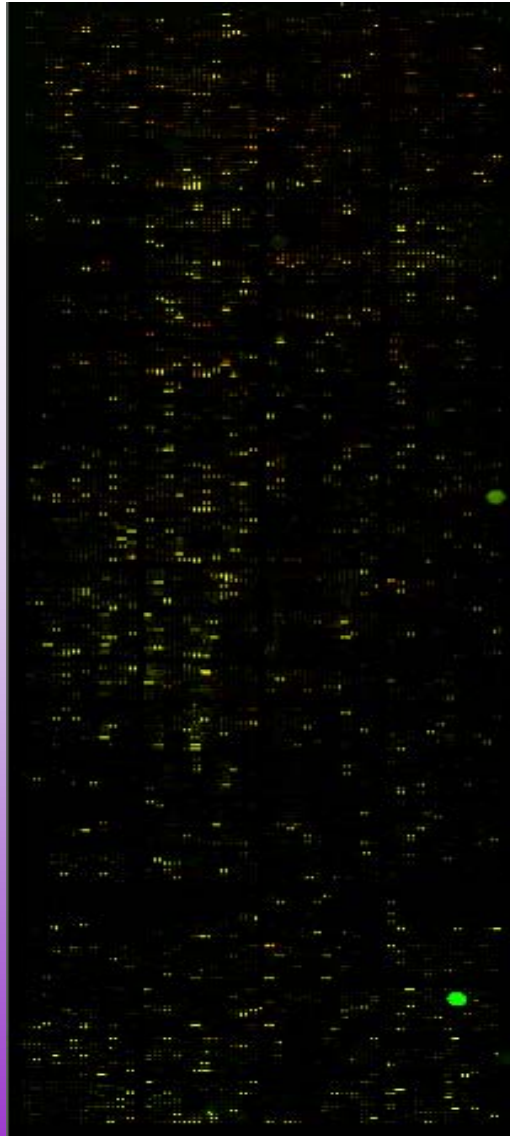

ISB 5/6/05

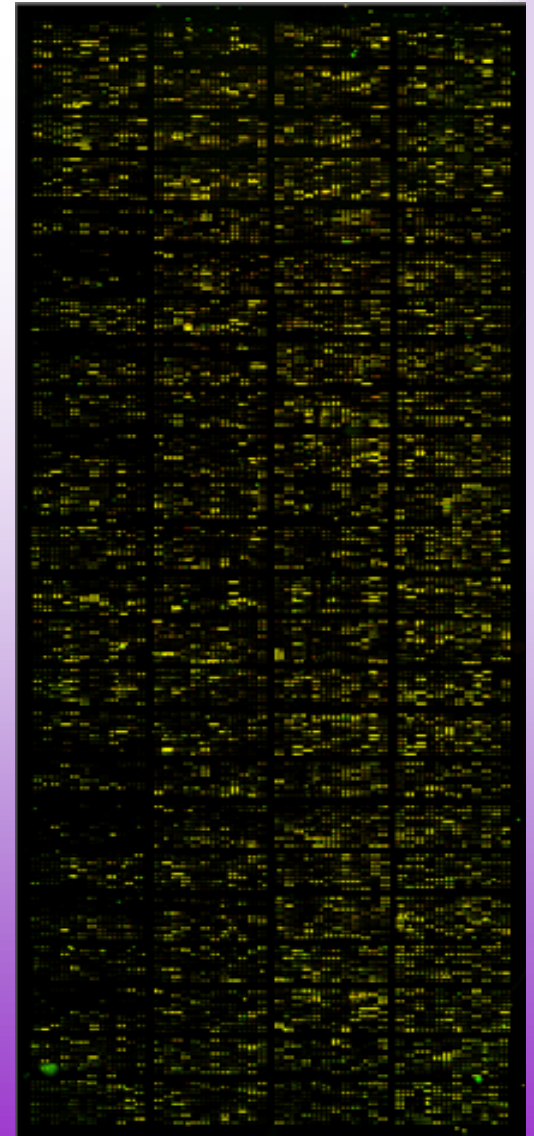

Genisphere 5/6/05



# Results

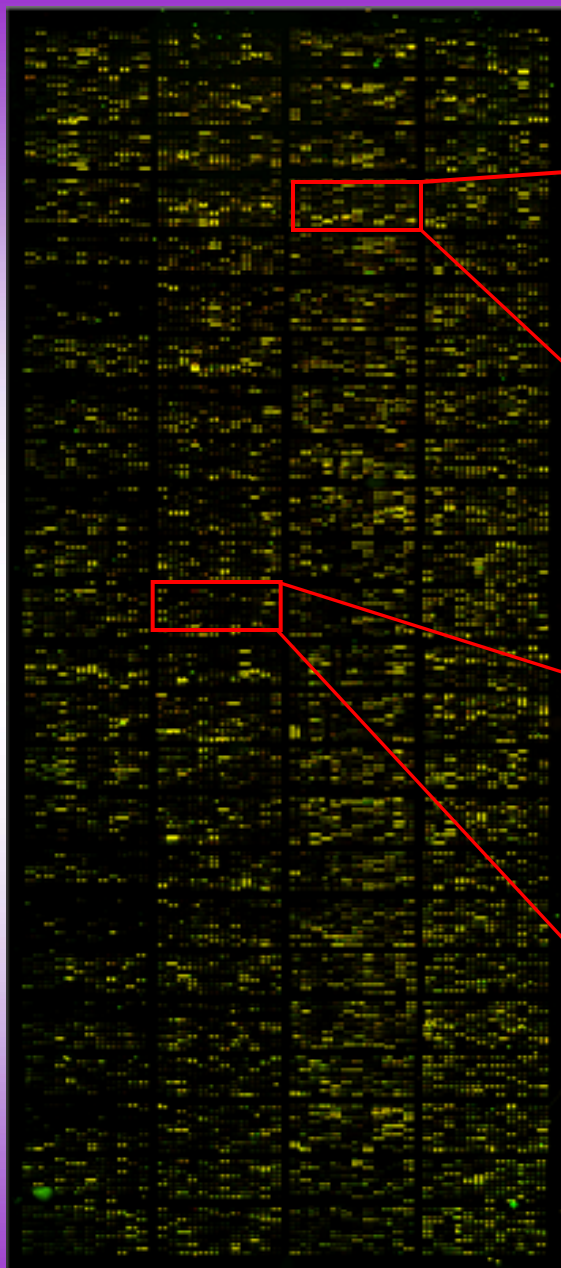

Strong Repression

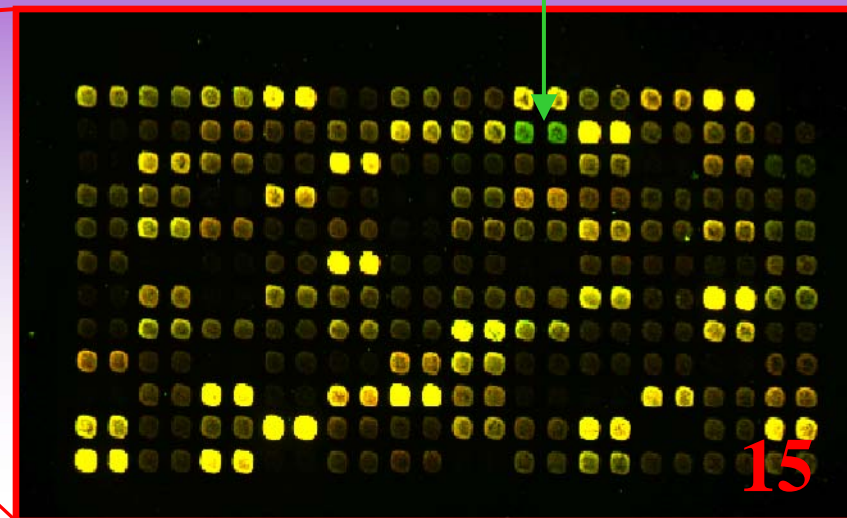

Strong Induction

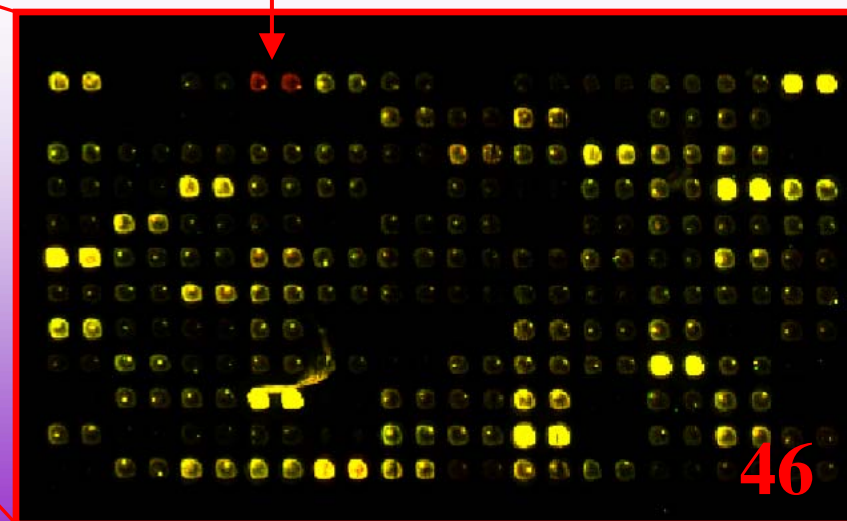

# Results

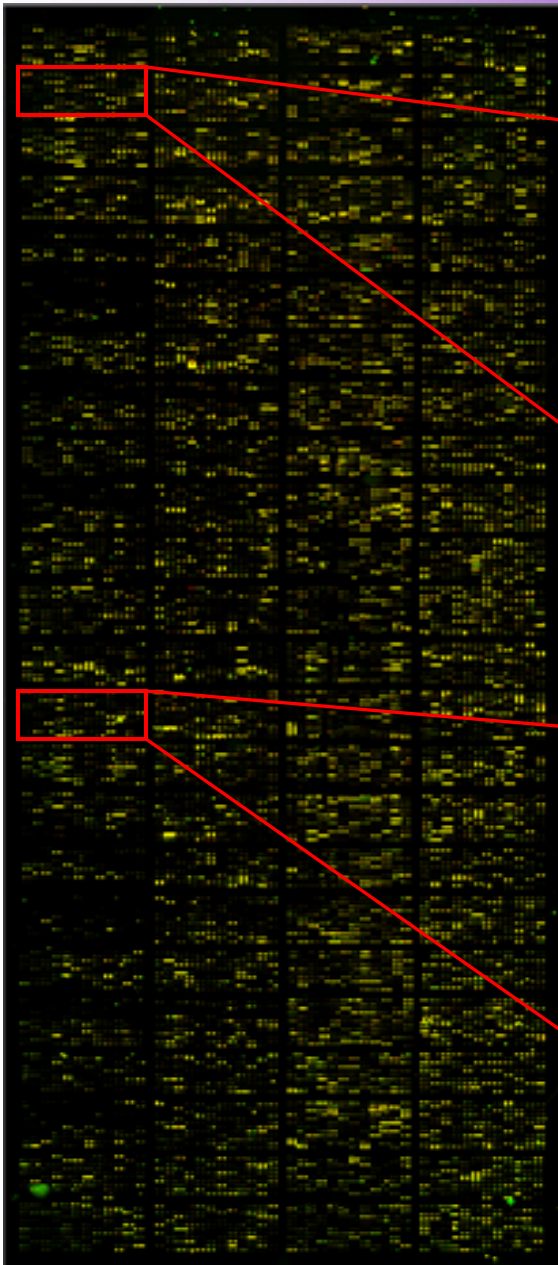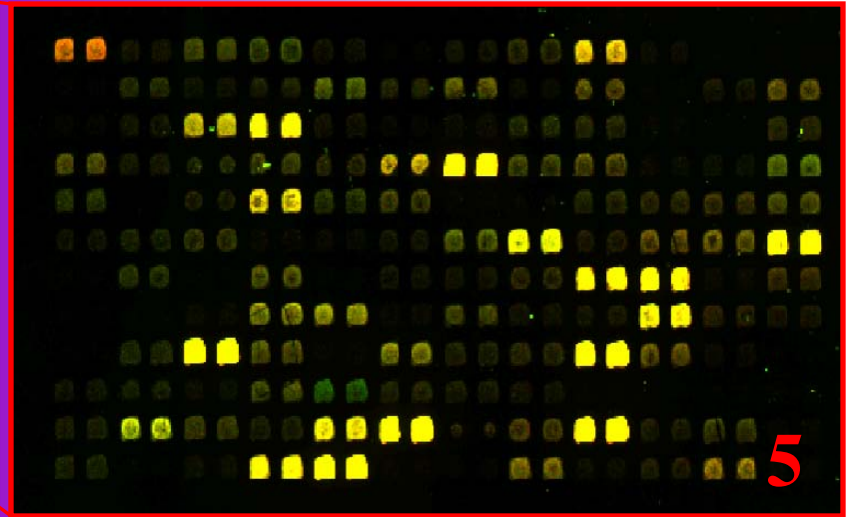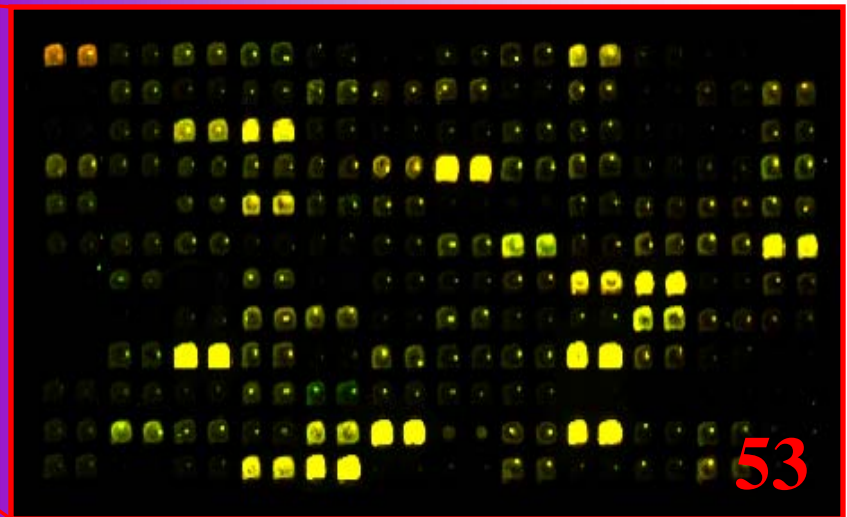

# Results

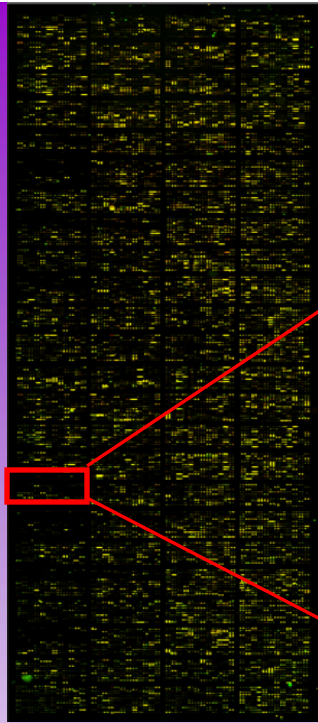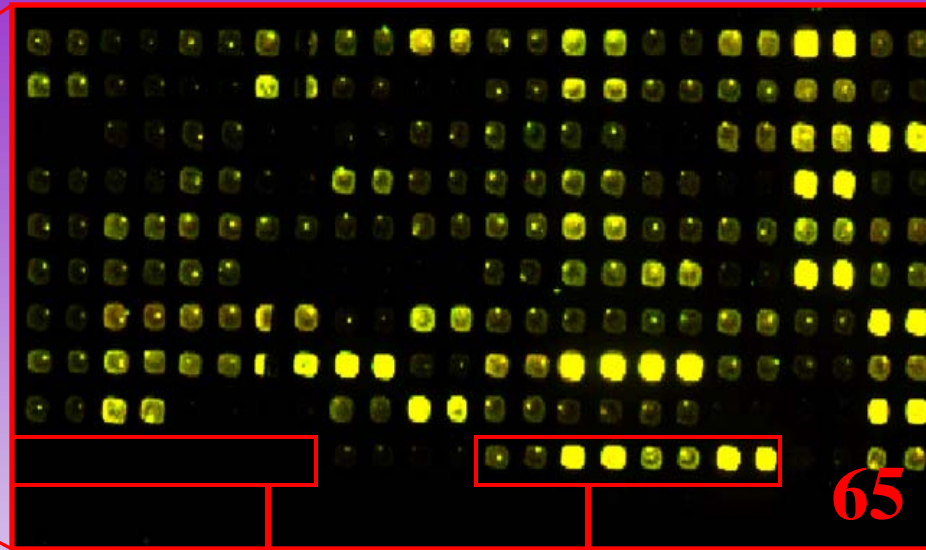

65

| zoneRow | zoneCol | row | col | ref            | gene_name | plate_384 | external_ID | stranded | feature_size | feature_attachment |
|---------|---------|-----|-----|----------------|-----------|-----------|-------------|----------|--------------|--------------------|
| 10      | 3       | 10  | 1   | EMPTY          | EMPTY     | YC-17     | EMPTY       | ssDNA    | 110um        | covalent           |
| 10      | 3       | 10  | 2   | EMPTY          | EMPTY     | YC-17     | EMPTY       | ssDNA    | 110um        | covalent           |
| 10      | 3       | 10  | 3   | EMPTY          | EMPTY     | YC-17     | EMPTY       | ssDNA    | 110um        | covalent           |
| 10      | 3       | 10  | 4   | EMPTY          | EMPTY     | YC-17     | EMPTY       | ssDNA    | 110um        | covalent           |
| 10      | 3       | 10  | 5   | EMPTY          | EMPTY     | YC-17     | EMPTY       | ssDNA    | 110um        | covalent           |
| 10      | 3       | 10  | 6   | EMPTY          | EMPTY     | YC-17     | EMPTY       | ssDNA    | 110um        | covalent           |
| 10      | 3       | 10  | 7   | EMPTY          | EMPTY     | YC-17     | EMPTY       | ssDNA    | 110um        | covalent           |
| 10      | 3       | 10  | 8   | EMPTY          | EMPTY     | YC-17     | EMPTY       | ssDNA    | 110um        | covalent           |
| 10      | 3       | 10  | 9   | YPR196W_       | YPR196W   | YC-17     | YPR196W     | ssDNA    | 110um        | covalent           |
| 10      | 3       | 10  | 10  | YPR196W_       | YPR196W   | YC-17     | YPR196W     | ssDNA    | 110um        | covalent           |
| 10      | 3       | 10  | 11  | YPR193C_HPA2   | HPA2      | YC-17     | YPR193C     | ssDNA    | 110um        | covalent           |
| 10      | 3       | 10  | 12  | YPR193C_HPA2   | HPA2      | YC-17     | YPR193C     | ssDNA    | 110um        | covalent           |
| 10      | 3       | 10  | 13  | YPR190C_RPC82  | RPC82     | YC-17     | YPR190C     | ssDNA    | 110um        | covalent           |
| 10      | 3       | 10  | 14  | YPR190C_RPC82  | RPC82     | YC-17     | YPR190C     | ssDNA    | 110um        | covalent           |
| 10      | 3       | 10  | 15  | YPR187W_RPO26  | RPO26     | YC-17     | YPR187W     | ssDNA    | 110um        | covalent           |
| 10      | 3       | 10  | 16  | YPR187W_RPO26  | RPO26     | YC-17     | YPR187W     | ssDNA    | 110um        | covalent           |
| 10      | 3       | 10  | 17  | YCR027C_RHB1   | RHB1      | YB-02     | YCR027C     | ssDNA    | 110um        | covalent           |
| 10      | 3       | 10  | 18  | YCR027C_RHB1   | RHB1      | YB-02     | YCR027C     | ssDNA    | 110um        | covalent           |
| 10      | 3       | 10  | 19  | YCR024C-A_PMP1 | PMP1      | YB-02     | YCR024C-A   | ssDNA    | 110um        | covalent           |
| 10      | 3       | 10  | 20  | YCR024C-A_PMP1 | PMP1      | YB-02     | YCR024C-A   | ssDNA    | 110um        | covalent           |

# Data Analysis

- Magic Tool
  - Load image files
  - Address and grid
  - Segmentation
  - Statistical analysis

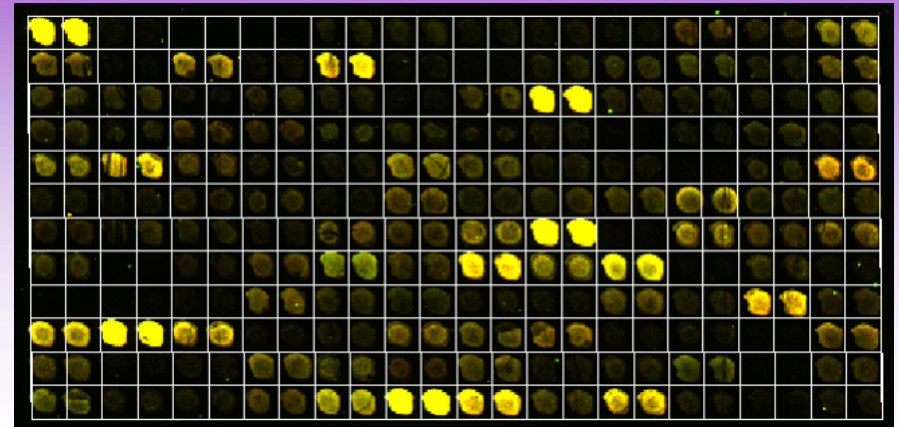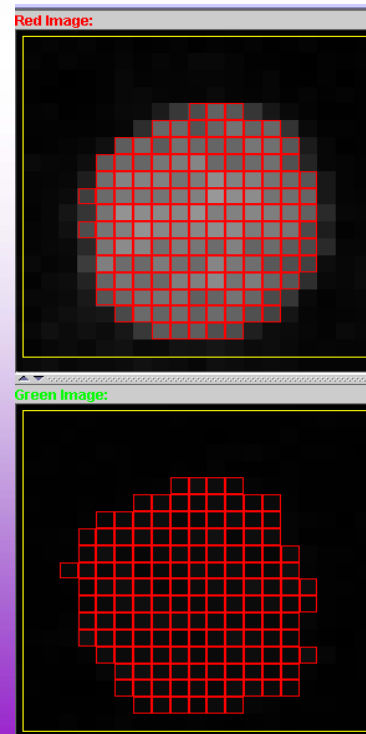

Data For: YBR042C\_rep1

Red FG Total: 15476

Red BG Total: 2156

Green FG Total: 1639

Green BG Total: 359

Ratio: 9.4423

# Future Work

- Replicate UV light experiment:
  - To prove reproducibility
  - Change experimental conditions
- Subject yeast to a chemical stress:
  - Plasticizers
    - Hormone mimics
    - n-Butyl Phthalate (Dibutyl Phthalate)

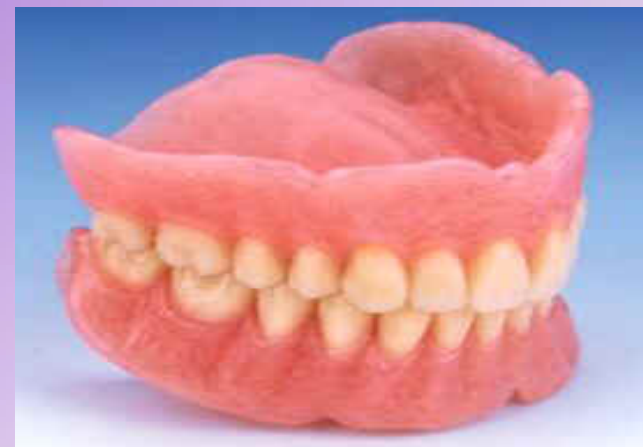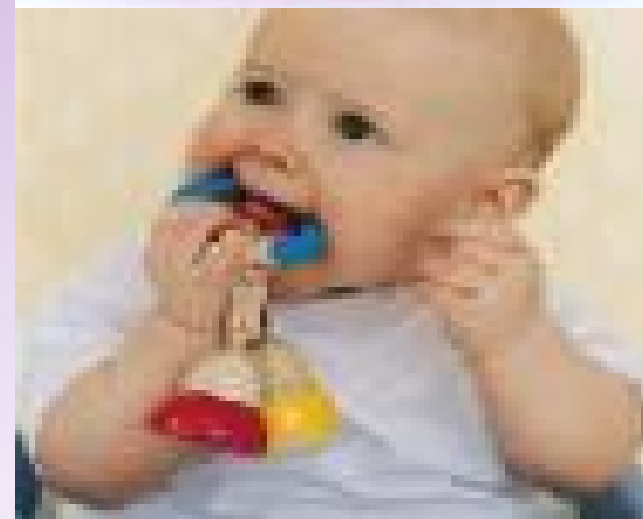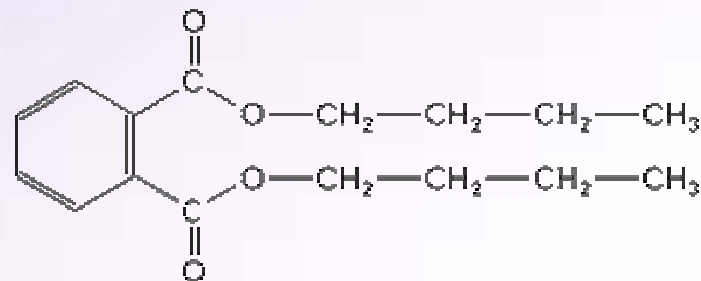

# Acknowledgements

- Genomic Consortium for Active Teaching (GCAT @ Davidson College)
  - Dr. Malcolm Campbell
  - Dr. Laurie Heyer
  - Dr. Laura Hoopes
  - Dr. Mary Lee Ledbetter
- Dr. Karen Bernd @ Davidson College
- Longwood University
  - Dr. Consuelo Alvarez
  - Dr. Michael Langham
  - Dr. Gary Lutz
  - Dr. Anthony Palombella
  - Student Funds

# Microarray Analysis of *Saccharomyces cerevisiae* cells under chemical and environmental stress

David E. Walker, Gary P. Lutz and Consuelo J. Alvarez

Department of Natural Sciences, Loyola University Chicago, IL 60659 USA

## Chemical Stress: Dibutyl phthalate

### Background

Dibutyl phthalate is a common plasticizer used in a wide variety of polymers. It is a colorless, odorless, and tasteless liquid. It is used in a wide variety of products, including paints, coatings, and plastics. It is also used in the production of synthetic fibers and in the manufacture of dyes and pigments. Dibutyl phthalate is also used in the production of perfumes and cosmetics. It is a common environmental pollutant and is known to be toxic to aquatic life. It is also known to be a carcinogen and to cause reproductive and developmental effects in humans and animals.

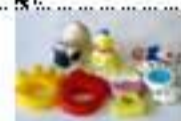

Figure 1: Chemical structure of dibutyl phthalate.

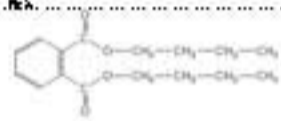

Figure 2: Chemical structure of dibutyl phthalate.

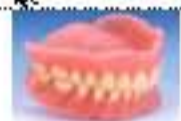

Figure 3: Chemical structure of dibutyl phthalate.

### Research Question

What genes are upregulated in *S. cerevisiae* cells exposed to dibutyl phthalate stress?

### Methods

The yeast cells were grown in YEA medium. Cells were exposed to dibutyl phthalate for 24 hours. Total RNA was extracted and labeled with a fluorescent dye. The labeled RNA was hybridized to a microarray chip containing DNA probes for all genes in the yeast genome. The array was scanned and the resulting image was analyzed using software to identify differentially expressed genes.

### Results

| Gene Name | Function                | Log2 Fold Change | Significance |
|-----------|-------------------------|------------------|--------------|
| YEA001    | Yeast cell wall protein | 1.5              | 0.001        |
| YEA002    | Yeast cell wall protein | 1.2              | 0.01         |
| YEA003    | Yeast cell wall protein | 1.8              | 0.0001       |
| YEA004    | Yeast cell wall protein | 1.1              | 0.05         |
| YEA005    | Yeast cell wall protein | 1.3              | 0.005        |
| YEA006    | Yeast cell wall protein | 1.4              | 0.002        |
| YEA007    | Yeast cell wall protein | 1.6              | 0.0005       |
| YEA008    | Yeast cell wall protein | 1.7              | 0.0001       |
| YEA009    | Yeast cell wall protein | 1.9              | 0.00001      |
| YEA010    | Yeast cell wall protein | 2.0              | 0.000001     |

Figure 4: Table of differentially expressed genes.

### Future work

Future work will focus on identifying the specific mechanisms by which dibutyl phthalate stress leads to the upregulation of these genes. This may involve studying the signaling pathways involved in the response to chemical stress.

### References

Walker, D.E., Lutz, G.P., Alvarez, C.J. (2010) Microarray analysis of *Saccharomyces cerevisiae* cells under chemical stress. *Journal of Microbiology*, 150(1), 1-10.

Walker, D.E., Lutz, G.P., Alvarez, C.J. (2011) The role of the yeast cell wall in response to chemical stress. *Journal of Cell Biology*, 193(1), 1-10.

Walker, D.E., Lutz, G.P., Alvarez, C.J. (2012) The role of the yeast cell wall in response to chemical stress. *Journal of Cell Biology*, 198(1), 1-10.

Walker, D.E., Lutz, G.P., Alvarez, C.J. (2013) The role of the yeast cell wall in response to chemical stress. *Journal of Cell Biology*, 201(1), 1-10.

Walker, D.E., Lutz, G.P., Alvarez, C.J. (2014) The role of the yeast cell wall in response to chemical stress. *Journal of Cell Biology*, 206(1), 1-10.

Walker, D.E., Lutz, G.P., Alvarez, C.J. (2015) The role of the yeast cell wall in response to chemical stress. *Journal of Cell Biology*, 211(1), 1-10.

Walker, D.E., Lutz, G.P., Alvarez, C.J. (2016) The role of the yeast cell wall in response to chemical stress. *Journal of Cell Biology*, 216(1), 1-10.

Walker, D.E., Lutz, G.P., Alvarez, C.J. (2017) The role of the yeast cell wall in response to chemical stress. *Journal of Cell Biology*, 221(1), 1-10.

Walker, D.E., Lutz, G.P., Alvarez, C.J. (2018) The role of the yeast cell wall in response to chemical stress. *Journal of Cell Biology*, 226(1), 1-10.

Walker, D.E., Lutz, G.P., Alvarez, C.J. (2019) The role of the yeast cell wall in response to chemical stress. *Journal of Cell Biology*, 231(1), 1-10.

## Environmental Stress: Ultraviolet light

### Background

Ultraviolet light is a form of electromagnetic radiation with a wavelength shorter than visible light, but longer than X-rays. It is divided into three categories: UVA, UVB, and UVC. UVA is the least harmful, but can still cause skin aging and some skin cancer. UVB is more harmful and can cause sunburn and skin cancer. UVC is the most harmful and is used for sterilization. Ultraviolet light is a common environmental stressor for many organisms, including plants and animals.

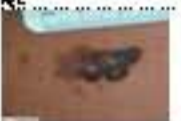

Figure 1: Ultraviolet light source.

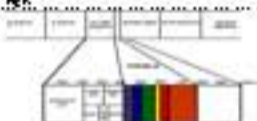

Figure 2: Diagram of the microarray technique.

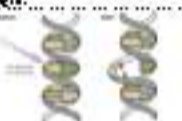

Figure 3: DNA double helix structure.

### Research Question

What genes are upregulated in *S. cerevisiae* cells exposed to ultraviolet light stress?

### Methods

The yeast cells were grown in YEA medium. Cells were exposed to ultraviolet light for 24 hours. Total RNA was extracted and labeled with a fluorescent dye. The labeled RNA was hybridized to a microarray chip containing DNA probes for all genes in the yeast genome. The array was scanned and the resulting image was analyzed using software to identify differentially expressed genes.

### Results

| Gene Name | Function                | Log2 Fold Change | Significance |
|-----------|-------------------------|------------------|--------------|
| YEA011    | Yeast cell wall protein | 1.5              | 0.001        |
| YEA012    | Yeast cell wall protein | 1.2              | 0.01         |
| YEA013    | Yeast cell wall protein | 1.8              | 0.0001       |
| YEA014    | Yeast cell wall protein | 1.1              | 0.05         |
| YEA015    | Yeast cell wall protein | 1.3              | 0.005        |
| YEA016    | Yeast cell wall protein | 1.4              | 0.002        |
| YEA017    | Yeast cell wall protein | 1.6              | 0.0005       |
| YEA018    | Yeast cell wall protein | 1.7              | 0.0001       |
| YEA019    | Yeast cell wall protein | 1.9              | 0.00001      |
| YEA020    | Yeast cell wall protein | 2.0              | 0.000001     |

Figure 4: Table of differentially expressed genes.

### Future work

Future work will focus on identifying the specific mechanisms by which ultraviolet light stress leads to the upregulation of these genes. This may involve studying the signaling pathways involved in the response to environmental stress.

### Acknowledgements

We thank the following individuals for their assistance in the laboratory: Dr. John Doe, Dr. Jane Smith, and Dr. Bob Johnson. We also thank the following organizations for their support: the National Science Foundation, the American Cancer Society, and the National Institutes of Health.

## The Microarray Technique

The microarray technique is a powerful tool for studying gene expression. It involves the simultaneous measurement of the expression levels of thousands of genes. The technique is based on the hybridization of labeled RNA to DNA probes on a solid support. The resulting image is analyzed using software to identify differentially expressed genes.

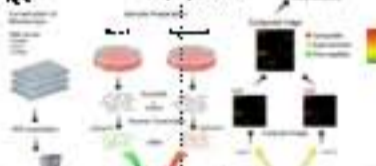

Figure 5: Diagram of the microarray technique.

## Data Analysis

Data analysis is a critical step in the microarray process. It involves the identification of differentially expressed genes and the interpretation of the resulting data. This may involve the use of statistical methods and bioinformatics tools.

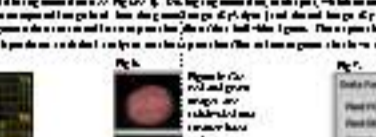

Figure 6: Diagram of data analysis.

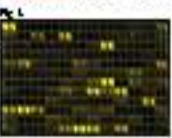

Figure 7: Microarray image showing gene expression patterns.

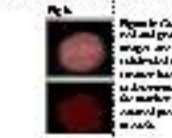

Figure 8: Microarray image showing gene expression patterns.

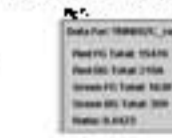

Figure 9: Microarray image showing gene expression patterns.

- 1) The microarray data was analyzed using software to identify differentially expressed genes.
- 2) The results were compared to a database of gene expression data to identify potential targets.
- 3) The identified genes were validated using quantitative PCR and Western blotting.
- 4) The expression levels of the identified genes were measured in response to stress.
- 5) The results were used to develop a model of the signaling pathway involved in the response to stress.

## GENE EXPRESSION OF *SACCHAROMYCES CEREVISIAE* EXPOSED TO COMMERCIAL WOOD PRESERVATIVES BY MICROARRAY ANALYSIS

Madison M. Stevens (Consuelo J. Alvarez<sup>1</sup>, Gary P. Lutz<sup>2</sup>) <sup>1</sup>Department of Biological and Environmental Sciences, <sup>2</sup>Department of Chemistry and Physics, Longwood University, 201 High Street, Farmville, VA, 23909

Pentachlorophenol (PCP) and Creosote are two commercial wood preservatives that are regulated by the EPA because of their toxicity to wildlife and humans. To observe changes in gene expression in organisms exposed to these compounds, a model system such as *Saccharomyces cerevisiae* (baker's yeast) was used. *S. cerevisiae* cells were exposed to creosote concentrations of 30ng/ml or 50ng/ml and to a PCP concentration of 50 $\mu$ M. Since creosote and PCP were suspended in methylene chloride and ethanol, respectively, yeast cells were also exposed separately to the solvents as controls. cDNA was prepared from a total RNA extraction of exposed and non-exposed *S. cerevisiae* cells and was hybridized onto microarray chips containing the entire yeast genome using Genisphere Array Kit procedures. Analysis of the microarray data using Magic Tool software shows interesting trends in gene expression. In the creosote data, ~10% of genes were induced at 30ng/ml, while ~82% were induced at 50ng/ml. In the PCP data, ~7% of genes were induced. Particular genes of interest from the data include TIP and CIS3 which are responsible for cell wall organization and biogenesis. In addition TRX3 and ATX1, which are responsible for response to oxidative stress, proved interesting. The data is reported as the log<sub>2</sub> of the ratios of expression. In the future, the genes of interest will be selected for RT-PCR (real time PCR) to validate that their expression was correctly measured in the original microarray.



DATA ANALYSIS OF A GENE EXPRESSION EXPERIMENT FOR *SACCHAROMYCES CEREVISIAE* EXPOSED TO COMMERCIAL WOOD PRESERVATIVES BY MICROARRAY ANALYSIS

Ashley M. Swandby (M. Leigh Lunsford<sup>1</sup>, Madison M. Stevens<sup>2</sup>, Consuelo J. Alvarez<sup>2</sup>, Gary P. Lutz<sup>3</sup>)<sup>1</sup> Department of Mathematics and Computer Science, <sup>2</sup>Department of Biological and Environmental Sciences, <sup>3</sup>Department of Chemistry and Physics, Longwood University, 201 High Street, Farmville, VA, 23909

DNA Microarray experiments produce a large amount of data that must be evaluated in order to draw biological conclusions. Because of the nature of experimentation, many processes can contribute to variation in the data. Microarray data is sensitive to this variation and can lead to incorrect conclusions being drawn. By using statistical methods, we evaluate the data and determine if there are any biases or other unexpected occurrences that need to be investigated. By performing normalization of the data, we can eliminate discrepancies between the data and create a large set of consistent data. We are not attempting to alter the data, but we simply want to eliminate the presence of influences that affect the actual experiment being observed. Once the data has been normalized, we will apply various statistical methods to determine the outcome of the experimental processes being performed by the Biology Department.

|      | A         | B  | C  | D  | E        | F                                                             | G | H | I | J |
|------|-----------|----|----|----|----------|---------------------------------------------------------------|---|---|---|---|
| 5536 | YBL092W   | 12 | 21 | 14 | YBL092W  | Ribosomal protein L32,II                                      |   |   |   |   |
| 5537 | YPL016W   | 12 | 21 | 15 | YPL016W  | Zinc-finger transcription factor,XVI                          |   |   |   |   |
| 5538 | YJL052W   | 12 | 21 | 16 | YJL052W  | Glyceraldehyde-3-phosphate dehydrogenase 1,X                  |   |   |   |   |
| 5539 | Empty     | 12 | 21 | 17 | Empty    | Empty                                                         |   |   |   |   |
| 5540 | Empty     | 12 | 21 | 18 | Empty    | Empty                                                         |   |   |   |   |
| 5541 | Empty     | 12 | 21 | 19 | Empty    | Empty                                                         |   |   |   |   |
| 5542 | Empty     | 12 | 21 | 20 | Empty    | Empty                                                         |   |   |   |   |
| 5543 | Empty     | 12 | 21 | 21 | Empty    | Empty                                                         |   |   |   |   |
| 5544 | Empty     | 12 | 21 | 22 | Empty    | Empty                                                         |   |   |   |   |
| 5545 | YBL068W   | 13 | 1  | 1  | YBL068W  | ribose-phosphate pyrophosphokinase 4,II                       |   |   |   |   |
| 5546 | YBL070C   | 13 | 1  | 2  | YBL070C  | Ybl070cp,II                                                   |   |   |   |   |
| 5547 | YBL072C   | 13 | 1  | 3  | YBL072C  | Ribosomal protein S8A (S14A) (rp19) (YS9),II                  |   |   |   |   |
| 5548 | YBL074C   | 13 | 1  | 4  | YBL074C  | MATa1-mRNA splicing factor,II                                 |   |   |   |   |
| 5549 | YBL076C   | 13 | 1  | 5  | YBL076C  | cytoplasmic isoleucyl-tRNA synthetase,II                      |   |   |   |   |
| 5550 | YBL078C   | 13 | 1  | 6  | YBL078C  | Aut7p has homology to LC3, a microtubule-associated protein   |   |   |   |   |
| 5551 | YBL091C-A | 13 | 1  | 7  | YBL091C- | Ybl091c-ap,II                                                 |   |   |   |   |
| 5552 | YBL093C   | 13 | 1  | 8  | YBL093C  | RNA polymerase II holoenzyme/mediator subunit,II              |   |   |   |   |
| 5553 | YBL095W   | 13 | 1  | 9  | YBL095W  | Ybl095wp,II                                                   |   |   |   |   |
| 5554 | YBL097W   | 13 | 1  | 10 | YBL097W  | involved in chromosome maintenance; similar to Drosophila     |   |   |   |   |
| 5555 | YBL099W   | 13 | 1  | 11 | YBL099W  | mitochondrial F1F0-ATPase alpha subunit,II                    |   |   |   |   |
| 5556 | YBL101C   | 13 | 1  | 12 | YBL101C  | involved in cell wall biogenesis,II                           |   |   |   |   |
| 5557 | YBL113C   | 13 | 1  | 13 | YBL113C  | Ybl113cp,II                                                   |   |   |   |   |
| 5558 | YBR002C   | 13 | 1  | 14 | YBR002C  | cis-prenyltransferase,II                                      |   |   |   |   |
| 5559 | YBR004C   | 13 | 1  | 15 | YBR004C  | Ybr004cp,II                                                   |   |   |   |   |
| 5560 | YBR006W   | 13 | 1  | 16 | YBR006W  | succinate semialdehyde dehydrogenase,II                       |   |   |   |   |
| 5561 | YBR008C   | 13 | 1  | 17 | YBR008C  | Major Facilitator Transporter,II                              |   |   |   |   |
| 5562 | YBR010W   | 13 | 1  | 18 | YBR010W  | Histone H3 (HHT1 and HHT2 code for identical proteins),II     |   |   |   |   |
| 5563 | YBR022W   | 13 | 1  | 19 | YBR022W  | Ybr022wp,II                                                   |   |   |   |   |
| 5564 | YBR024W   | 13 | 1  | 20 | YBR024W  | SCO1 protein homolog ( <i>S. cerevisiae</i> ),II              |   |   |   |   |
| 5565 | YBR026C   | 13 | 1  | 21 | YBR026C  | Nuclear protein that binds to T-rich strand of core consensus |   |   |   |   |
| 5566 | YBR028C   | 13 | 1  | 22 | YBR028C  | Probable ser/thr-specific protein kinase, homolog to YKR2     |   |   |   |   |
| 5567 | YBR030W   | 13 | 2  | 1  | YBR030W  | Ybr030wp,II                                                   |   |   |   |   |
| 5568 | YBR032W   | 13 | 2  | 2  | YBR032W  | Ybr032wp,II                                                   |   |   |   |   |
| 5569 | YCL032W   | 13 | 2  | 3  | YCL032W  | STE50,III                                                     |   |   |   |   |
| 5570 | YCL034W   | 13 | 2  | 4  | YCL034W  | Ycl034wp,III                                                  |   |   |   |   |
| 5571 | YCL036W   | 13 | 2  | 5  | YCL036W  | Ycl036wp,III                                                  |   |   |   |   |
| 5572 | YCL038C   | 13 | 2  | 6  | YCL038C  | Membrane transporter,III                                      |   |   |   |   |
| 5573 | YCL040W   | 13 | 2  | 7  | YCL040W  | Glucokinase,III                                               |   |   |   |   |
| 5574 | YCL042W   | 13 | 2  | 8  | YCL042W  | Ycl042wp,III                                                  |   |   |   |   |
| 5575 | YCL057W   | 13 | 2  | 9  | YCL057W  | Saccharolysin (oligopeptidase yscD),III                       |   |   |   |   |
| 5576 | YCL059C   | 13 | 2  | 10 | YCL059C  | involved in cell division and spore germination,III           |   |   |   |   |
| 5577 | YCL063W   | 13 | 2  | 11 | YCL063W  | Ycl063wp,III                                                  |   |   |   |   |
| 5578 | YCL065W   | 13 | 2  | 12 | YCL065W  | Ycl065wp,III                                                  |   |   |   |   |
| 5579 | YCL067C   | 13 | 2  | 13 | YCL067C  | Mating type protein alpha-2,III                               |   |   |   |   |
| 5580 | YCL069W   | 13 | 2  | 14 | YCL069W  | Membrane transporter,III                                      |   |   |   |   |

|      | A              | B           | C |
|------|----------------|-------------|---|
| 5103 | YER103W_rep8   | 0.870967742 |   |
| 5104 | YLL039C_rep9   | 0.898089172 |   |
| 5105 | YBL092W_rep9   | 1.42595769  |   |
| 5106 | YPL016W_rep9   | 1.142857143 |   |
| 5107 | YJL052W_rep9   | 1.251714882 |   |
| 5108 | YBL068W_rep1   | 1.685990338 |   |
| 5109 | YBL070C_rep1   | 999         |   |
| 5110 | YBL072C_rep1   | 1.230916844 |   |
| 5111 | YBL074C_rep1   | 6.666666667 |   |
| 5112 | YBL076C_rep1   | 1.276621787 |   |
| 5113 | YBL078C_rep1   | 0.66557377  |   |
| 5114 | YBL091C-A_rep1 | 1.04368932  |   |
| 5115 | YBL093C_rep1   | 1.193103448 |   |
| 5116 | YBL095W_rep1   | 1.030612245 |   |
| 5117 | YBL097W_rep1   | 3           |   |
| 5118 | YBL099W_rep1   | 1.016784452 |   |
| 5119 | YBL101C_rep1   | 1.606299213 |   |
| 5120 | YBL113C_rep1   | 1.113246753 |   |
| 5121 | YBR002C_rep1   | 1.328244275 |   |
| 5122 | YBR004C_rep1   | 0.936046512 |   |
| 5123 | YBR006W_rep1   | 0.615384615 |   |
| 5124 | YBR008C_rep1   | 1.454545455 |   |
| 5125 | YBR010W_rep1   | 1.130877508 |   |
| 5126 | YBR022W_rep1   | 1.072164948 |   |
| 5127 | YBR024W_rep1   | 0.9375      |   |
| 5128 | YBR026C_rep1   | 1.066176471 |   |
| 5129 | YBR028C_rep1   | 1.623655914 |   |
| 5130 | YBR030W_rep1   | 0.52293578  |   |
| 5131 | YBR032W_rep1   | 999         |   |
| 5132 | YCL032W_rep1   | 1.010526316 |   |
| 5133 | YCL034W_rep1   | 1.076470588 |   |
| 5134 | YCL036W_rep1   | 4           |   |
| 5135 | YCL038C_rep1   | 1.134615385 |   |
| 5136 | YCL040W_rep1   | 0.541343079 |   |
| 5137 | YCL042W_rep1   | 0.633763838 |   |
| 5138 | YCL057W_rep1   | 1.371052632 |   |
| 5139 | YCL059C_rep1   | 1.167676768 |   |
| 5140 | YCL063W_rep1   | 3.044444444 |   |
| 5141 | YCL065W_rep1   | 999         |   |
| 5142 | YCL067C_rep1   | 1.207165109 |   |
| 5143 | YCL069W_rep1   | 999         |   |
| 5144 | YCR010C_rep1   | 4.5         |   |
| 5145 | YCR012W_rep1   | 1.326435675 |   |
| 5146 | YCR014C_rep1   | 1.962962963 |   |
| 5147 | YCR016W_rep1   | 1.635135135 |   |
| 5148 | YCR018C_rep1   | 1.583333333 |   |

|      | A               | B           | C |
|------|-----------------|-------------|---|
| 5477 | YPL187W_rep1    | 1.442169132 |   |
| 5478 | YPL189W_rep1    | 999         |   |
| 5479 | YPL191C_rep1    | 1.619047619 |   |
| 5480 | YPL205C_rep1    | 999         |   |
| 5481 | YPL207W_rep1    | 1.445820433 |   |
| 5482 | YPL209C_rep1    | 2.066666667 |   |
| 5483 | YPL211W_rep1    | 1.323920266 |   |
| 5484 | YPL213W_rep1    | 1.571428571 |   |
| 5485 | YPL215W_rep1    | 1.039215686 |   |
| 5486 | YPL229W_rep1    | 1.169811321 |   |
| 5487 | YPL231W_rep1    | 1.283918282 |   |
| 5488 | YPL233W_rep1    | 1.346153846 |   |
| 5489 | YPL235W_rep1    | 1.334872979 |   |
| 5490 | YPL237W_rep1    | 1.42524377  |   |
| 5491 | YPL239W_rep1    | 1.517808219 |   |
| 5492 | YCONTROL57_rep1 | 999         |   |
| 5493 | YCONTROL63_rep1 | 999         |   |
| 5494 | YCONTROL91_rep1 | 999         |   |
| 5495 | YCONTROL02_rep1 | 999         |   |
| 5496 | YCONTROL97_rep1 | 999         |   |
| 5497 | YCONTROL99_rep1 | 0.142857143 |   |
| 5498 | YCONTROL57_rep  | 1           |   |
| 5499 | YCONTROL63_rep  | 999         |   |
| 5500 | YCONTROL91_rep  | 999         |   |
| 5501 | YCONTROL02_rep  | 999         |   |
| 5502 | YCONTROL97_rep  | 999         |   |
| 5503 | YCONTROL99_rep  | 999         |   |
| 5504 | YCONTROL57_rep  | 999         |   |
| 5505 | YCONTROL63_rep  | 999         |   |
| 5506 | YCONTROL91_rep  | 3.5         |   |
| 5507 | YCONTROL02_rep  | 999         |   |
| 5508 | YCONTROL97_rep  | 999         |   |
| 5509 | YCONTROL99_rep  | 999         |   |
| 5510 | YCONTROL57_rep  | 3           |   |
| 5511 | YCONTROL63_rep  | 999         |   |
| 5512 | YCONTROL91_rep  | 999         |   |
| 5513 | YCONTROL02_rep  | 999         |   |
| 5514 | YCONTROL97_rep  | 999         |   |
| 5515 | YCONTROL99_rep  | 999         |   |
| 5516 | YAR019C_rep1    | 1.225352113 |   |
| 5517 | YAR023C_rep1    | 1.416666667 |   |
| 5518 | YAR028W_rep1    | 1.162037037 |   |
| 5519 | YAR030C_rep1    | 11          |   |
| 5520 | YAR033W_rep1    | 1.285714286 |   |
| 5521 | YAR042W_rep1    | 1.428571429 |   |
| 5522 | YAR073W_rep1    | 1.188449848 |   |

|    | A              | B        | C        | D        | E        | F        | G        | H        | I        | J |
|----|----------------|----------|----------|----------|----------|----------|----------|----------|----------|---|
| 1  | ORF            | RedFGtot | RedBGtot | GrnFGtot | GrnBGtot | RedFGavg | RedBGavg | GrnFGavg | GrnBGavg |   |
| 2  | YBR045C_rep1   | 24       | 3        | 9        | 59       | 0.161074 | 0.014151 | 0.060403 | 0.278302 |   |
| 3  | YBR047W_rep1   | 125      | 5        | 107      | 0        | 0.838926 | 0.023585 | 0.718121 | 0        |   |
| 4  | YBR049C_rep1   | 380      | 4        | 231      | 0        | 2.550336 | 0.018868 | 1.550336 | 0        |   |
| 5  | YBR051W_rep1   | 8        | 1        | 3        | 0        | 0.053691 | 0.004717 | 0.020134 | 0        |   |
| 6  | YBR053C_rep1   | 540      | 94       | 490      | 698      | 3.624161 | 0.443396 | 3.288591 | 3.292453 |   |
| 7  | YBR055C_rep1   | 117      | 37       | 154      | 197      | 0.785235 | 0.174528 | 1.033557 | 0.929245 |   |
| 8  | YBR069C_rep1   | 795      | 12       | 476      | 0        | 5.33557  | 0.056604 | 3.194631 | 0        |   |
| 9  | YBR071W_rep1   | 70       | 3        | 45       | 1        | 0.469799 | 0.014151 | 0.302013 | 0.004717 |   |
| 10 | YBR073W_rep1   | 337      | 2        | 232      | 0        | 2.261745 | 0.009434 | 1.557047 | 0        |   |
| 11 | YBR075W_rep1   | 353      | 5        | 280      | 0        | 2.369128 | 0.023585 | 1.879195 | 0        |   |
| 12 | YBR077C_rep1   | 257      | 6        | 210      | 0        | 1.724832 | 0.028302 | 1.409396 | 0        |   |
| 13 | YBR079C_rep1   | 1186     | 13       | 867      | 0        | 7.959732 | 0.061321 | 5.818792 | 0        |   |
| 14 | YBR091C_rep1   | 237      | 4        | 147      | 0        | 1.590604 | 0.018868 | 0.986577 | 0        |   |
| 15 | YBR093C_rep1   | 2107     | 206      | 1328     | 105      | 14.14094 | 0.971698 | 8.912752 | 0.495283 |   |
| 16 | YBR095C_rep1   | 172      | 20       | 110      | 9        | 1.154362 | 0.09434  | 0.738255 | 0.042453 |   |
| 17 | YBR097W_rep1   | 84       | 20       | 49       | 9        | 0.563758 | 0.09434  | 0.328859 | 0.042453 |   |
| 18 | YBR099C_rep1   | 44       | 13       | 46       | 9        | 0.295302 | 0.061321 | 0.308725 | 0.042453 |   |
| 19 | YBR101C_rep1   | 415      | 32       | 273      | 22       | 2.785235 | 0.150943 | 1.832215 | 0.103774 |   |
| 20 | YBR115C_rep1   | 292      | 106      | 211      | 70       | 1.959732 | 0.5      | 1.416107 | 0.330189 |   |
| 21 | YBR117C_rep1   | 11       | 16       | 2        | 5        | 0.073826 | 0.075472 | 0.013423 | 0.023585 |   |
| 22 | YBR119W_rep1   | 71       | 8        | 69       | 2        | 0.47651  | 0.037736 | 0.463087 | 0.009434 |   |
| 23 | YBR121C_rep1   | 882      | 489      | 641      | 319      | 5.919463 | 2.306604 | 4.302013 | 1.504717 |   |
| 24 | YBR123C_rep1   | 133      | 3        | 96       | 11       | 0.892617 | 0.014151 | 0.644295 | 0.051887 |   |
| 25 | YBR125C_rep1   | 189      | 5        | 161      | 0        | 1.268456 | 0.023585 | 1.080537 | 0        |   |
| 26 | YCR053W_rep1   | 1808     | 2        | 1147     | 0        | 12.13423 | 0.009434 | 7.697987 | 0        |   |
| 27 | YCR057C_rep1   | 427      | 2        | 215      | 0        | 2.865772 | 0.009434 | 1.442953 | 0        |   |
| 28 | YCR060W_rep1   | 531      | 24       | 400      | 164      | 3.563758 | 0.113208 | 2.684564 | 0.773585 |   |
| 29 | YCR062W_rep1   | 456      | 8        | 220      | 0        | 3.060403 | 0.037736 | 1.47651  | 0        |   |
| 30 | YCR064C_rep1   | 4        | 4        | 79       | 0        | 0.026846 | 0.018868 | 0.530201 | 0        |   |
| 31 | YCR066W_rep1   | 40       | 6        | 40       | 10       | 0.268456 | 0.028302 | 0.268456 | 0.04717  |   |
| 32 | YCR083W_rep1   | 354      | 2        | 346      | 1        | 2.375839 | 0.009434 | 2.322148 | 0.004717 |   |
| 33 | YCR085W_rep1   | 17       | 6        | 0        | 0        | 0.114094 | 0.028302 | 0        | 0        |   |
| 34 | YCR087C-A_rep1 | 433      | 9        | 313      | 0        | 2.90604  | 0.042453 | 2.100671 | 0        |   |
| 35 | YCR088W_rep1   | 1333     | 34       | 1044     | 21       | 8.946309 | 0.160377 | 7.006711 | 0.099057 |   |
| 36 | YCR090C_rep1   | 325      | 110      | 270      | 173      | 2.181208 | 0.518868 | 1.812081 | 0.816038 |   |
| 37 | YCR092C_rep1   | 147      | 11       | 73       | 0        | 0.986577 | 0.051887 | 0.489933 | 0        |   |
| 38 | YCR105W_rep1   | 6        | 2        | 1        | 0        | 0.040268 | 0.009434 | 0.006711 | 0        |   |
| 39 | YCR107W_rep1   | 72       | 7        | 63       | 4        | 0.483221 | 0.033019 | 0.422819 | 0.018868 |   |
| 40 | YDL002C_rep1   | 349      | 35       | 277      | 19       | 2.342282 | 0.165094 | 1.85906  | 0.089623 |   |
| 41 | YDL004W_rep1   | 351      | 46       | 303      | 37       | 2.355705 | 0.216981 | 2.033557 | 0.174528 |   |
| 42 | YDL006W_rep1   | 157      | 40       | 114      | 26       | 1.053691 | 0.188679 | 0.765101 | 0.122642 |   |
| 43 | YDL008W_rep1   | 152      | 29       | 97       | 21       | 1.020134 | 0.136792 | 0.651007 | 0.099057 |   |
| 44 | YDL022W_rep1   | 989      | 37       | 1557     | 37       | 6.637584 | 0.174528 | 10.44966 | 0.174528 |   |
| 45 | YDL024C_rep1   | 5        | 12       | 3        | 1        | 0.033557 | 0.056604 | 0.020134 | 0.004717 |   |
| 46 | YDL026W_rep1   | 6        | 0        | 1        | 0        | 0.040268 | 0        | 0.006711 | 0        |   |

| File Edit View Insert Format Tools Data Window REExcel |               |          |          |          |          |
|--------------------------------------------------------|---------------|----------|----------|----------|----------|
| D5150 Ratio                                            |               |          |          |          |          |
|                                                        | A             | B        | C        | D        | E        |
| 5150                                                   | ORF           | RedFGtot | GrnFGtot | Ratio    | high 200 |
| 5151                                                   | YIL120W_rep1  | 81       | 70       | 1.157143 |          |
| 5152                                                   | YIL134W_rep1  | 105      | 76       | 1.381579 |          |
| 5153                                                   | YIL136W_rep1  | 152      | 306      | 0.496732 | good     |
| 5154                                                   | YIL138C_rep1  | 891      | 686      | 1.298834 | good     |
| 5155                                                   | YIL140W_rep1  | 201      | 150      | 1.34     | good     |
| 5156                                                   | YIL142W_rep1  | 749      | 594      | 1.260943 | good     |
| 5157                                                   | YIL144W_rep1  | 81       | 58       | 1.396552 |          |
| 5158                                                   | YJR001W_rep1  | 416      | 163      | 2.552147 | good     |
| 5159                                                   | YJR003C_rep1  | 150      | 80       | 1.875    | good     |
| 5160                                                   | YJR005W_rep1  | 206      | 156      | 1.320513 | good     |
| 5161                                                   | YJR007W_rep1  | 972      | 692      | 1.404624 | good     |
| 5162                                                   | YJR009C_rep17 | 11225    | 10858    | 1.0338   | good     |
| 5163                                                   | YJR010W_rep1  | 248      | 67       | 3.701493 | good     |
| 5164                                                   | YJR024C_rep1  | 350      | 295      | 1.186441 | good     |
| 5165                                                   | YJR026W_rep1  | 1706     | 1123     | 1.519145 | good     |
| 5166                                                   | YJR028W_rep1  | 1355     | 907      | 1.493936 | good     |
| 5167                                                   | YJR030C_rep1  | 99       | 65       | 1.523077 |          |
| 5168                                                   | YJR032W_rep1  | 203      | 161      | 1.26087  | good     |
| 5169                                                   | YJR034W_rep1  | 233      | 240      | 0.970833 | good     |
| 5170                                                   | YJR048W_rep1  | 590      | 468      | 1.260684 | good     |
| 5171                                                   | YJR050W_rep1  | 115      | 103      | 1.116505 | good     |
| 5172                                                   | YJR052W_rep1  | 95       | 89       | 1.067416 |          |
| 5173                                                   | YJR054W_rep1  | 167      | 96       | 1.739583 | good     |
| 5174                                                   | YJR056C_rep1  | 115      | 98       | 1.173469 | good     |
| 5175                                                   | YJR058C_rep1  | 474      | 459      | 1.03268  | good     |
| 5176                                                   | YJR072C_rep1  | 462      | 383      | 1.206266 | good     |
| 5177                                                   | YJR074W_rep1  | 251      | 201      | 1.248756 | good     |
| 5178                                                   | YJR076C_rep1  | 394      | 305      | 1.291803 | good     |
| 5179                                                   | YJR078W_rep1  | 12       | 4        | 3        |          |
| 5180                                                   | YJR080C_rep1  | 202      | 168      | 1.202381 | good     |
| 5181                                                   | YJR083C_rep1  | 86       | 65       | 1.323077 |          |
| 5182                                                   | YKL217W_rep1  | 17       | 3        | 5.666667 |          |
| 5183                                                   | YKL219W_rep1  | 121      | 87       | 1.390805 | good     |
| 5184                                                   | YKL221W_rep1  | 13       | 3        | 4.333333 |          |

F1 Induction

|      | A              | B      | C     | D        | E       | F       | G       |
|------|----------------|--------|-------|----------|---------|---------|---------|
| 1    | ORF            | RedFGI | GmFGI | Ratio    | high 20 | Inducti | Repress |
| 29   | YCR062W_rep1   | 456    | 220   | 2.072727 | good    | ind     |         |
| 37   | YCR092C_rep1   | 147    | 73    | 2.013699 | good    | ind     |         |
| 76   | YDR449C_rep1   | 202    | 80    | 2.525    | good    | ind     |         |
| 102  | YFL002W-B_rep1 | 331    | 92    | 3.597826 | good    | ind     |         |
| 117  | YFL064C_rep1   | 295    | 87    | 3.390805 | good    | ind     |         |
| 190  | YJL011C_rep1   | 264    | 122   | 2.163934 | good    | ind     |         |
| 228  | YLL012W_rep1   | 157    | 69    | 2.275362 | good    | ind     |         |
| 346  | YOR296W_rep1   | 158    | 72    | 2.194444 | good    | ind     |         |
| 349  | YOR301W_rep1   | 164    | 77    | 2.12987  | good    | ind     |         |
| 359  | YOR343C-A_rep1 | 252    | 82    | 3.073171 | good    | ind     |         |
| 457  | YDL127W_rep1   | 147    | 69    | 2.130435 | good    | ind     |         |
| 496  | YEL045C_rep1   | 1622   | 579   | 2.801382 | good    | ind     |         |
| 522  | YGL014W_rep1   | 591    | 288   | 2.052083 | good    | ind     |         |
| 561  | YHR122W_rep1   | 160    | 75    | 2.133333 | good    | ind     |         |
| 570  | YHR149C_rep1   | 198    | 92    | 2.152174 | good    | ind     |         |
| 574  | YHR169W_rep1   | 236    | 114   | 2.070175 | good    | ind     |         |
| 657  | YLR409C_rep1   | 347    | 168   | 2.065476 | good    | ind     |         |
| 658  | YLR410W-A_rep1 | 170    | 60    | 2.833333 | good    | ind     |         |
| 722  | YOL151W_rep1   | 333    | 133   | 2.503759 | good    | ind     |         |
| 839  | YCR047C_rep1   | 260    | 115   | 2.26087  | good    | ind     |         |
| 864  | YDR075W_rep1   | 223    | 111   | 2.009009 | good    | ind     |         |
| 870  | YDR098C-A_rep1 | 1728   | 799   | 2.162703 | good    | ind     |         |
| 919  | YFL014W_rep1   | 566    | 262   | 2.160305 | good    | ind     |         |
| 958  | YHL049C_rep1   | 226    | 95    | 2.378947 | good    | ind     |         |
| 976  | YHR066W_rep1   | 436    | 176   | 2.477273 | good    | ind     |         |
| 1070 | YLR347C_rep1   | 377    | 176   | 2.142045 | good    | ind     |         |
| 1074 | YLR355C_rep1   | 4084   | 1771  | 2.306042 | good    | ind     |         |
| 1108 | YNL110C_rep1   | 1396   | 647   | 2.157651 | good    | ind     |         |
| 1162 | YOR306C_rep1   | 307    | 142   | 2.161972 | good    | ind     |         |
| 1181 | YPL267W_rep1   | 178    | 83    | 2.144578 | good    | ind     |         |
| 1205 | YLR212C_rep2   | 243    | 120   | 2.025    | good    | ind     |         |
| 1211 | YLR212C_rep3   | 268    | 120   | 2.233333 | good    | ind     |         |
| 1306 | YDR210W-A_rep1 | 241    | 114   | 2.114035 | good    | ind     |         |
| 1415 | YLL025W_rep1   | 153    | 73    | 2.09589  | good    | ind     |         |

original \noC,G,R \noC,G,I/

| 1    | ORF            | RedFG | GrnFG | Ratio    | high 20 | Inducti | Repress |
|------|----------------|-------|-------|----------|---------|---------|---------|
| 129  | YGR008C_rep1   | 966   | 2304  | 0.419271 | good    |         | rep     |
| 218  | YKR086W_rep1   | 823   | 1934  | 0.425543 | good    |         | rep     |
| 280  | YMR104C_rep1   | 68    | 141   | 0.48227  | good    |         | rep     |
| 431  | YBR216C_rep1   | 73    | 199   | 0.366834 | good    |         | rep     |
| 758  | YPL014W_rep1   | 192   | 430   | 0.446512 | good    |         | rep     |
| 1066 | YLR327C_rep1   | 260   | 667   | 0.389805 | good    |         | rep     |
| 1324 | YEL011W_rep1   | 179   | 618   | 0.289644 | good    |         | rep     |
| 1333 | YEL039C_rep1   | 179   | 560   | 0.319643 | good    |         | rep     |
| 1392 | YHR092C_rep1   | 1251  | 2512  | 0.49801  | good    |         | rep     |
| 1633 | YBR233W-A_rep1 | 384   | 1006  | 0.38171  | good    |         | rep     |
| 2054 | YPL230W_rep1   | 64    | 168   | 0.380952 | good    |         | rep     |
| 2319 | YLR177W_rep1   | 113   | 305   | 0.370492 | good    |         | rep     |
| 2604 | YGR249W_rep1   | 58    | 168   | 0.345238 | good    |         | rep     |
| 2621 | YHL021C_rep1   | 287   | 724   | 0.396409 | good    |         | rep     |
| 2697 | YKR058W_rep1   | 129   | 301   | 0.428571 | good    |         | rep     |
| 2719 | YLR258W_rep1   | 513   | 1039  | 0.493744 | good    |         | rep     |
| 2911 | YBR298C_rep1   | 84    | 210   | 0.4      | good    |         | rep     |
| 2948 | YDR277C_rep1   | 301   | 690   | 0.436232 | good    |         | rep     |
| 2984 | YER067W_rep1   | 523   | 3086  | 0.169475 | good    |         | rep     |
| 3039 | YHR185C_rep1   | 21    | 190   | 0.110526 | good    |         | rep     |
| 3066 | YJL142C_rep1   | 293   | 591   | 0.49577  | good    |         | rep     |
| 3570 | YMR103C_rep1   | 122   | 288   | 0.423611 | good    |         | rep     |
| 3571 | YMR105C_rep1   | 568   | 1256  | 0.452229 | good    |         | rep     |
| 3726 | YDL048C_rep1   | 83    | 331   | 0.250755 | good    |         | rep     |
| 4152 | YDR070C_rep1   | 91    | 209   | 0.435407 | good    |         | rep     |
| 4154 | YDR074W_rep1   | 400   | 1156  | 0.346021 | good    |         | rep     |
| 4319 | YKR075C_rep1   | 79    | 191   | 0.413613 | good    |         | rep     |
| 4418 | YOL052C-A_rep1 | 193   | 453   | 0.426049 | good    |         | rep     |
| 4466 | YPL247C_rep1   | 160   | 321   | 0.498442 | good    |         | rep     |
| 4551 | YBR183W_rep1   | 114   | 230   | 0.495652 | good    |         | rep     |
| 4588 | YDR171W_rep1   | 684   | 1537  | 0.445023 | good    |         | rep     |
| 4635 | YFR015C_rep1   | 361   | 1539  | 0.234568 | good    |         | rep     |
| 4636 | YFR017C_rep1   | 240   | 883   | 0.271801 | good    |         | rep     |

Filter Mode



| Q #1 | Q #2 | Q #3 | Q #4 | Q #5 | Q #6 | Q #7 | Q #8 | Q #9 | Q #10 | Q #11 | Q #12 | Q #13 | Q #14 | Q #15 | Q #16 | Q #17 | Q #18 | Q #19 | Q #20 | Student status | GPA  |
|------|------|------|------|------|------|------|------|------|-------|-------|-------|-------|-------|-------|-------|-------|-------|-------|-------|----------------|------|
| 4    | 4    | 4    | 4    | 4    | 4    | 4    | 4    | 4    | 4     | 4     | 4     | 4     | 4     | 4     | 4     | 4     | 4     | 4     | 4     | JR             | 3    |
| 3    | 3    | 3    | 3    | 3    | 4    | 3    | 2    | 3    | 3     | 4     | 4     | 3     | 3     | 4     | 3     | 4     | 3     | 3     | 3     | SR             | 3.23 |
| 3    | 3    | 3    | 3    | 3    | 4    | 4    | 3    | 3    | 3     | 4     | 4     | 4     | 3     | 3     | 3     | 3     | 3     | 4     | 4     | JR             | 2.2  |
| 3    | 3    | 3    | 3    | 3    | 1    | 3    | 1    | 1    | 1     | 1     | 1     | 1     | 2     | 2     | 0     | 1     | 3     | 4     | 0     | JR             | 2.99 |
| 4    | 4    | 4    | 3    | 3    | 0    | 3    | 4    | 4    | 2     | 3     | 3     |       | 2     | 4     | 4     | 3     | 2     | 4     | 4     | JR             | 3.5  |
| 3    | 3    | 3    | 4    | 4    | 0    | 0    | 0    | 1    | 0     | 3     | 3     | 3     | 3     | 0     | 0     | 2     | 3     | 4     | 3     | SO             | 2.92 |
| 3    | 3    | 4    | 1    | 3    | 1    | 3    | 0    | 0    | 0     | 3     | 4     | 4     | 0     | 0     | 0     | 3     | 3     | 3     | 3     | SO             | 2.6  |
| 4    | 4    | 4    | 5    | 4    | 3    | 4    | 3    | 3    | 4     | 3     | 4     | 3     | 4     | 4     | 4     | 5     | 5     | 5     | 4     | JR             | 3    |
| 3    | 3    | 3    | 4    | 2    | 0    | 0    | 0    | 0    | 3     | 3     | 3     | 3     | 3     | 0     | 0     | 0     | 2     | 4     | 2     | SO             | 3.5  |
| 3    | 4    | 4    | 5    | 5    | 4    | 5    | 5    | 4    | 4     | 5     | 4     | 4     | 5     | 4     | 4     | 4     | 5     | 5     | 5     | JR             | 2.6  |
| 5    | 5    | 2    | 3    | 5    | 1    | 3    | 1    | 1    | 1     | 2     | 1     | 5     | 5     | 1     | 5     | 5     | 5     | 5     | 2     | SO             | 2.7  |
| 4    | 3    | 2    | 3    | 3    | 4    | 3    | 1    | 3    | 4     | 3     | 3     | 3     | 4     | 3     | 3     | 3     | 4     | 5     | 4     | SO             | 2.6  |
| 0    | 2    | 2    | 3    | 2    | 2    | 2    | 3    | 3    | 2     | 3     | 3     | 2     | 3     | 3     | 2     | 2     | 2     | 3     | 3     | JR             | 2.7  |
| 2    | 3    | 3    | 3    | 3    | 2    | 3    | 2    | 3    | 2     | 3     | 2     | 3     | 3     | 2     | 3     | 2     | 3     | 2     | 3     | JR             | 3.3  |
| 3    | 2    | 2    | 3    | 2    | 3    | 3    | 2    | 3    | 2     | 1     | 3     | 3     | 4     | 2     | 2     | 3     | 4     | 4     | 3     | SO             | 2.9  |
| 5    | 5    | 5    | 5    | 5    | 3    | 4    | 4    | 4    | 3     | 5     | 5     | 4     | 5     | 5     | 5     | 5     | 5     | 5     | 5     | SO             | 3    |
| 3    | 3    | 2    | 2    | 3    | 3    | 3    | 1    | 0    | 2     | 3     | 3     | 4     | 4     | 2     | 3     | 3     | 0     | 3     | 3     | SO             | 3    |
| 3    | 3    | 5    | 4    | 4    | 2    | 4    | 3    | 4    | 0     | 4     | 0     | 0     | 3     | 4     | 2     | 3     | 3     | 4     | 0     | SO             | 3.4  |
| 3    | 3    | 2    | 4    | 3    | 0    | 3    | 3    | 3    | 4     | 4     | 4     | 4     | 4     | 4     | 3     | 3     | 2     | 3     | 4     | SO             | 2.29 |
